# Supplementary material for: Lower limb chronic edema management program: Perspectives of disengaged patients on challenges, enablers and barriers to program attendance and adherence
Source: PubMed Central journal article supplement (PMC6876834; doi:10.1371/journal.pone.0219875), 2019-11-25
Supplement: pone.0219875.s002.pdf [file pone.0219875.s002.pdf]

## Lower limb chronic edema management program: Perspectives of disengaged patients on challenges, enablers and barriers to program attendance and adherence.

### NVivo higher level nodes and sub-nodes

| Name                                                         | Files | References | Created On | Created By          | Modified On | Modified By         |
|--------------------------------------------------------------|-------|------------|------------|---------------------|-------------|---------------------|
| Effectiveness                                                |       | 6          | 19         | 25/10/2018 12:26 PM | AB          | 8/03/2019 3:37 PM   |
| Reduce swelling                                              |       | 1          | 1          | 6/12/2018 5:09 PM   | AB          | 6/12/2018 5:09 PM   |
| Better movement                                              |       | 1          | 1          | 6/12/2018 5:10 PM   | AB          | 6/12/2018 5:11 PM   |
| Ideal or ideal treatment                                     |       | 6          | 12         | 28/10/2018 5:20 PM  | AB          | 8/03/2019 3:42 PM   |
| Expectations of therapy                                      |       | 6          | 19         | 28/10/2018 5:40 PM  | AB          | 8/03/2019 3:53 PM   |
| Barriers to care and self (at home) care                     |       | 6          | 21         | 25/10/2018 12:27 PM | AB          | 8/03/2019 3:40 PM   |
| Challenges with recommended approach                         |       | 6          | 17         | 28/10/2018 5:25 PM  | AB          | 8/03/2019 3:49 PM   |
| Stigma (self consciousness) LK_emotion (e.g.frustration)     |       | 6          | 36         | 28/10/2018 5:30 PM  | AB          | 8/03/2019 4:05 PM   |
| Childhood experiences                                        |       | 1          | 1          | 15/11/2018 9:45 AM  | AB          | 15/11/2018 9:45 AM  |
| Seating in public spaces                                     |       | 2          | 4          | 15/11/2018 9:53 AM  | AB          | 15/11/2018 10:02 AM |
| Conscious of appearances                                     |       | 2          | 6          | 15/11/2018 9:58 AM  | AB          | 15/11/2018 10:01 AM |
| inappropriate focus on legs-stockings                        |       | 1          | 2          | 15/11/2018 10:17 AM | AB          | 15/11/2018 10:19 AM |
| Frustration with repeated explaining condition               |       | 1          | 1          | 15/11/2018 10:20 AM | AB          | 15/11/2018 10:20 AM |
| Maintain independence                                        |       | 4          | 14         | 29/10/2018 12:33 PM | AB          | 8/03/2019 4:15 PM   |
| Social-psychological implications for individual with Oedema |       | 6          | 33         | 18/10/2018 10:44 AM | AB          | 8/03/2019 4:01 PM   |
| Frustration with physical limitations                        |       | 1          | 1          | 15/11/2018 10:39 AM | AB          | 8/03/2019 4:17 PM   |
| social implication of debilitation                           |       | 0          | 0          | 15/11/2018 10:21 AM | AB          | 6/12/2018 5:02 PM   |
| Wheelchair and disability                                    |       | 1          | 2          | 6/12/2018 4:54 PM   | AB          | 8/03/2019 4:09 PM   |
| Family interaction                                           |       | 1          | 1          | 6/12/2018 4:50 PM   | AB          | 8/03/2019 4:06 PM   |
| Tailor made clothing                                         |       | 1          | 1          | 6/12/2018 4:47 PM   | AB          | 8/03/2019 4:08 PM   |
| socioability                                                 |       | 1          | 2          | 15/11/2018 10:16 AM | AB          | 8/03/2019 4:08 PM   |
| Poor community understanding                                 |       | 1          | 3          | 6/12/2018 4:52 PM   | AB          | 8/03/2019 4:08 PM   |
| House bound or country bound                                 |       | 3          | 10         | 6/12/2018 4:46 PM   | AB          | 6/12/2018 4:56 PM   |
| Gardening                                                    |       | 1          | 1          | 6/12/2018 4:53 PM   | AB          | 8/03/2019 4:07 PM   |
| Psychological support                                        |       | 1          | 2          | 15/11/2018 10:31 AM | AB          | 15/11/2018 10:48 AM |

|                          |                                       |  |   |    |                     |    |                     |    |
|--------------------------|---------------------------------------|--|---|----|---------------------|----|---------------------|----|
| <input type="radio"/>    | Lack of knowledge about how to treat  |  | 2 | 2  | 18/10/2018 10:03 AM | AB | 8/03/2019 3:30 PM   | AB |
| <input type="radio"/>    | First presentation                    |  | 4 | 7  | 18/10/2018 10:03 AM | AB | 4/11/2018 6:00 PM   | AB |
| <input type="radio"/>    | motivation to be involved in research |  | 4 | 5  | 18/10/2018 10:14 AM | AB | 4/11/2018 4:59 PM   | LK |
| <input type="radio"/>    | Pre Self management strategies        |  | 3 | 5  | 18/10/2018 10:16 AM | AB | 4/11/2018 6:08 PM   | AB |
| <input type="radio"/>    | Products and sources                  |  | 5 | 9  | 18/10/2018 10:30 AM | AB | 8/11/2018 9:24 PM   | AB |
| <input type="radio"/>    | Ongoing management                    |  | 5 | 21 | 18/10/2018 10:37 AM | AB | 10/11/2018 9:37 PM  | LK |
| <input type="checkbox"/> | Post Self management strategies       |  | 6 | 19 | 18/10/2018 10:42 AM | AB | 8/11/2018 9:30 PM   | AB |
| <input type="radio"/>    | Wound dressing                        |  | 2 | 4  | 11/11/2018 6:07 PM  | LK | 11/11/2018 6:19 PM  | LK |
| <input type="radio"/>    | Skin Care                             |  | 1 | 1  | 11/11/2018 6:07 PM  | LK | 11/11/2018 6:07 PM  | LK |
| <input type="radio"/>    | Monitor_Medication                    |  | 3 | 6  | 11/11/2018 6:14 PM  | LK | 11/11/2018 6:23 PM  | LK |
| <input type="radio"/>    | Rest_Exercise                         |  | 2 | 3  | 11/11/2018 6:15 PM  | LK | 11/11/2018 6:17 PM  | LK |
| <input type="checkbox"/> | Compression Therapy                   |  | 0 | 0  | 11/11/2018 6:19 PM  | LK | 11/11/2018 6:19 PM  | LK |
| <input type="radio"/>    | Compression Bandaging                 |  | 1 | 2  | 11/11/2018 6:12 PM  | LK | 11/11/2018 6:16 PM  | LK |
| <input type="radio"/>    | Compression Pump                      |  | 1 | 4  | 11/11/2018 6:21 PM  | LK | 11/11/2018 6:22 PM  | LK |
| <input type="radio"/>    | Stocking                              |  | 1 | 5  | 11/11/2018 6:06 PM  | LK | 11/11/2018 6:13 PM  | LK |
| <input type="radio"/>    | Wraps                                 |  | 1 | 1  | 11/11/2018 6:17 PM  | LK | 11/11/2018 6:18 PM  | LK |
| <input type="radio"/>    | Falls Prevention Aids                 |  | 1 | 1  | 11/11/2018 6:20 PM  | LK | 11/11/2018 6:21 PM  | LK |
| <input type="radio"/>    | Co-morbidities                        |  | 5 | 23 | 18/10/2018 10:43 AM | AB | 10/11/2018 10:00 PM | LK |
| <input type="radio"/>    | Hospitalisation                       |  | 4 | 7  | 25/10/2018 12:20 PM | AB | 10/11/2018 9:18 PM  | LK |
| <input type="radio"/>    | Description of oedema                 |  | 5 | 7  | 25/10/2018 12:21 PM | AB | 10/11/2018 9:55 PM  | LK |
| <input type="radio"/>    | Limitations of stockings AB_wraps     |  | 5 | 13 | 25/10/2018 12:23 PM | AB | 4/11/2018 6:25 PM   | AB |
| <input type="radio"/>    | alternative places for care           |  | 3 | 6  | 28/10/2018 5:13 PM  | AB | 4/11/2018 4:39 PM   | LK |
| <input type="radio"/>    | Pain pre and post                     |  | 6 | 14 | 28/10/2018 5:15 PM  | AB | 15/11/2018 3:27 PM  | AB |
| <input type="radio"/>    | Other possible treatments             |  | 5 | 7  | 28/10/2018 5:21 PM  | AB | 10/11/2018 9:20 PM  | LK |
| <input type="radio"/>    | Reason for CO                         |  | 6 | 6  | 28/10/2018 5:22 PM  | AB | 4/11/2018 5:58 PM   | AB |

|                                                    |   |    |                     |    |                     |    |   |
|----------------------------------------------------|---|----|---------------------|----|---------------------|----|---|
| [-] Impact on mobility and functionality due to CO | 6 | 33 | 28/10/2018 5:42 PM  | AB | 14/03/2019 1:02 PM  | LK | ● |
| [-] Reduced distance                               | 5 | 7  | 11/11/2018 8:39 PM  | LK | 11/11/2018 8:54 PM  | LK |   |
| [-] Mobility aid e.g. Walker, Wheelchair           | 3 | 6  | 11/11/2018 8:39 PM  | LK | 11/11/2018 8:54 PM  | LK |   |
| [-] Access to ACROD Parking                        | 3 | 4  | 11/11/2018 8:41 PM  | LK | 12/11/2018 10:25 PM | AB |   |
| [-] Altered Activity-unable to do                  | 4 | 10 | 11/11/2018 8:45 PM  | LK | 11/11/2018 8:56 PM  | LK |   |
| [-] Fatigue                                        | 2 | 3  | 11/11/2018 8:46 PM  | LK | 11/11/2018 8:52 PM  | LK |   |
| [-] Barriers to using clinic or hospital           | 4 | 10 | 29/10/2018 12:12 PM | AB | 8/03/2019 3:22 PM   | AB | ● |
| [-] Hospital_Clinic Accessibility                  | 3 | 7  | 1/11/2018 11:06 AM  | AB | 8/03/2019 3:19 PM   | AB | ● |
| [-] Lack of knowledge who to refer to              | 2 | 6  | 29/10/2018 9:54 PM  | LK | 8/03/2019 4:13 PM   | AB | ● |
| [-] Lack of knowledge of referral process          | 2 | 10 | 29/10/2018 10:23 PM | LK | 8/03/2019 4:13 PM   | AB | ● |
| [-] Adviser and most useful view                   | 5 | 12 | 18/10/2018 10:35 AM | AB | 8/03/2019 3:46 PM   | AB | ● |
| [-] Impact on family                               | 6 | 14 | 28/10/2018 5:46 PM  | AB | 8/03/2019 4:02 PM   | AB | ● |
| [-] Lack of understanding by others                | 1 | 3  | 30/10/2018 9:00 PM  | LK | 8/03/2019 4:14 PM   | AB | ● |
| [-] Initial diagnosis                              | 6 | 20 | 18/10/2018 9:54 AM  | AB | 11/11/2018 5:31 PM  | LK |   |
| [-] Vascular Clinic                                | 2 | 2  | 11/11/2018 5:31 PM  | LK | 11/11/2018 5:36 PM  | LK |   |
| [-] Dermatology                                    | 2 | 2  | 11/11/2018 5:33 PM  | LK | 11/11/2018 5:35 PM  | LK |   |
| [-] Cardiologist                                   | 1 | 1  | 11/11/2018 5:34 PM  | LK | 11/11/2018 5:35 PM  | LK |   |
| [-] Orthopaedic_Infectious Disease                 | 1 | 3  | 11/11/2018 5:36 PM  | LK | 11/11/2018 6:02 PM  | LK |   |
| [-] First oedema management_and LK_YEAR            | 5 | 15 | 18/10/2018 9:56 AM  | AB | 4/11/2018 3:31 PM   | LK |   |
| [-] Strategies of clinical care                    | 6 | 41 | 18/10/2018 9:57 AM  | AB | 10/11/2018 10:01 PM | LK |   |
| [-] Compression Therapy                            | 0 | 0  | 11/11/2018 5:39 PM  | LK | 8/03/2019 3:34 PM   | AB | ● |
| [-] MLD                                            | 3 | 6  | 11/11/2018 5:41 PM  | LK | 11/11/2018 5:52 PM  | LK |   |
| [-] Advice_Monitor                                 | 3 | 9  | 11/11/2018 5:45 PM  | LK | 11/11/2018 6:04 PM  | LK |   |
| [-] Exercise                                       | 1 | 3  | 11/11/2018 5:55 PM  | LK | 11/11/2018 5:57 PM  | LK |   |
| [-] Surgical                                       | 1 | 2  | 11/11/2018 5:58 PM  | LK | 11/11/2018 5:58 PM  | LK |   |

|                                                  |  |   |    |                     |    |                    |    |   |
|--------------------------------------------------|--|---|----|---------------------|----|--------------------|----|---|
| ○ Perception of progress of condition            |  | 0 | 0  | 28/10/2018 5:30 PM  | AB | 15/11/2018 3:37 PM | AB |   |
| ○ Functionality                                  |  | 6 | 21 | 15/11/2018 2:40 PM  | AB | 15/11/2018 3:36 PM | AB |   |
| ○ Walking distance                               |  | 1 | 2  | 11/11/2018 8:58 PM  | LK | 11/11/2018 9:19 PM | LK |   |
| ○ Being told- its good-no hospital               |  | 1 | 2  | 11/11/2018 9:25 PM  | LK | 11/11/2018 9:26 PM | LK |   |
| ○ Maintain within limits                         |  | 3 | 3  | 11/11/2018 9:16 PM  | LK | 11/11/2018 9:22 PM | LK |   |
| ○ Physical appearance                            |  | 4 | 6  | 11/11/2018 8:58 PM  | LK | 11/11/2018 9:21 PM | LK |   |
| ○ Comfort_Min Pain-Able to move                  |  | 4 | 8  | 11/11/2018 9:00 PM  | LK | 15/11/2018 3:30 PM | AB |   |
| ○ Reasons for non compliance                     |  | 3 | 5  | 28/10/2018 5:37 PM  | AB | 11/11/2018 9:23 PM | LK |   |
| ○ Personal reflection of condition               |  | 0 | 0  | 28/10/2018 5:38 PM  | AB | 15/11/2018 3:37 PM | AB |   |
| ○ People worse off than me                       |  | 2 | 4  | 15/11/2018 3:02 PM  | AB | 15/11/2018 3:15 PM | AB |   |
| ○ Fatalism                                       |  | 4 | 8  | 15/11/2018 3:03 PM  | AB | 15/11/2018 3:32 PM | AB |   |
| ○ Normalised condition by using aids that work   |  | 1 | 1  | 15/11/2018 3:05 PM  | AB | 15/11/2018 3:24 PM | AB |   |
| ○ Changed quality of life                        |  | 1 | 1  | 15/11/2018 3:20 PM  | AB | 15/11/2018 3:20 PM | AB |   |
| ○ Positive state of mind                         |  | 1 | 1  | 15/11/2018 3:29 PM  | AB | 15/11/2018 3:29 PM | AB |   |
| ○ Based on fear level                            |  | 2 | 2  | 15/11/2018 3:32 PM  | AB | 15/11/2018 3:33 PM | AB |   |
| ○ Quality of life                                |  | 3 | 8  | 28/10/2018 5:49 PM  | AB | 15/11/2018 3:20 PM | AB |   |
| ○ Health and medical implications for individual |  | 6 | 22 | 28/10/2018 6:03 PM  | AB | 15/11/2018 3:36 PM | AB |   |
| ○ Ulcers-Wounds                                  |  | 2 | 4  | 11/11/2018 9:32 PM  | LK | 8/03/2019 3:29 PM  | AB | ● |
| ○ Falls-Reduced balance                          |  | 4 | 18 | 11/11/2018 9:32 PM  | LK | 8/03/2019 3:29 PM  | AB | ● |
| ○ Footwear                                       |  | 3 | 4  | 11/11/2018 9:40 PM  | LK | 15/11/2018 2:59 PM | AB |   |
| ○ Fear of Falling                                |  | 1 | 4  | 11/11/2018 9:41 PM  | LK | 11/11/2018 9:42 PM | LK |   |
| ○ Cellulitis-Infection                           |  | 4 | 7  | 11/11/2018 9:33 PM  | LK | 8/03/2019 3:28 PM  | AB | ● |
| ○ Sensitivity-Pain                               |  | 2 | 5  | 11/11/2018 9:34 PM  | LK | 8/03/2019 3:29 PM  | AB | ● |
| ○ Meaningful outcome                             |  | 5 | 8  | 29/10/2018 11:56 AM | AB | 10/11/2018 9:58 PM | LK |   |
